# Supplementary material
Source: PubMed Central journal article supplement (PMC4060648)
Supplement: 1402275111_pnas.201402275SI.pdf [file 1402275111_pnas.201402275SI.pdf]

# Supporting Information

Iwasaki and Paszkowski 10.1073/pnas.1402275111

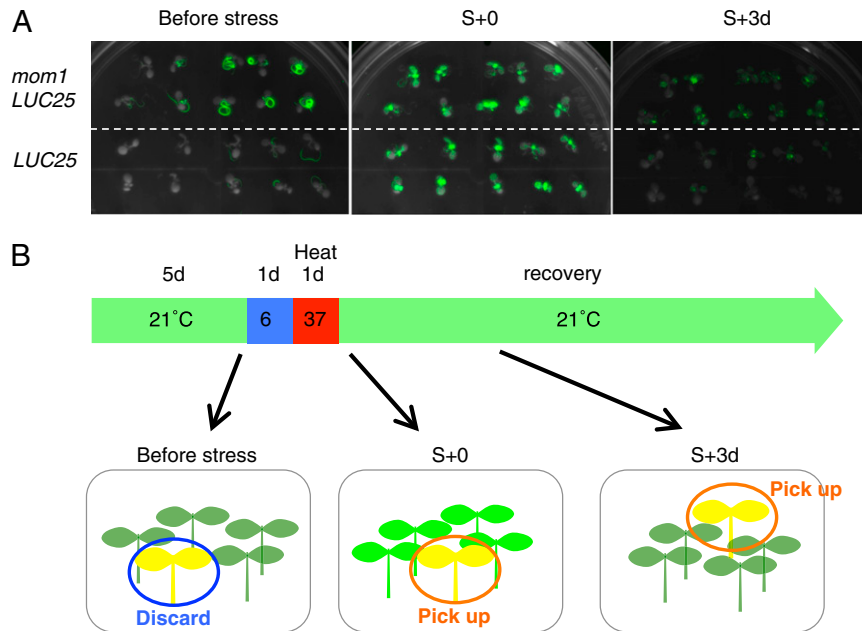

**Fig. S1.** Genetic screen for mutations that erase "stress memory." (A) Bioluminescence images of *mom1 LUC25* and *LUC25* plants before and after heat-stress treatment. Seedlings grown for 5 d at 21 °C (*Before stress*) were subjected to temperature stress (6 °C for 24 h and then 37 °C for 24 h) and then returned to 21 °C. Seedlings directly after treatment and 3 d after treatment are indicated by "S+0" and "S+3", respectively. Luciferase luminescence appears as a green signal. (B) Scheme of the genetic screen (details in the main text).

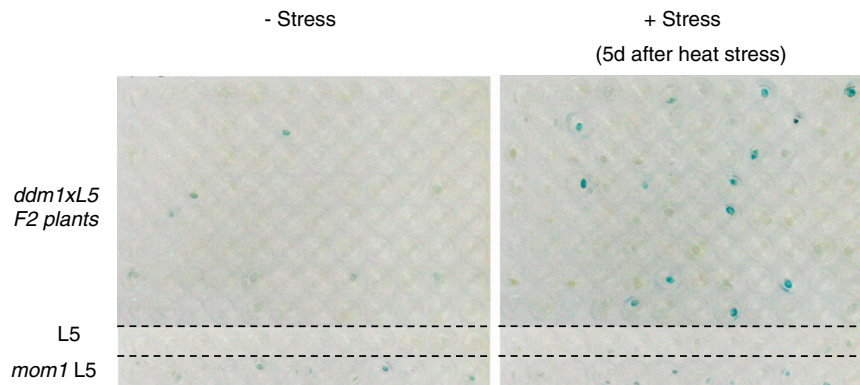

**Fig. S2.** The *ddm1* but not the *mom1* mutation enhances heat stress-dependent activation of transcription. Histochemical GUS staining of the cotyledons of segregating progeny of a cross between *ddm1-2* and L5. (Left) Control treatment. (Right) Heat-stressed seedlings.
